# Supplementary material for: Fluorescence amplification detection via terminal protection of small molecule–protein interactions
Source: Royal Society of Chemistry journal article supplement (doi:10.1039/c5ra20240j), 2015-01-01
Supplement: c5ra20240j1.pdf [file c5ra20240j1.pdf]

## Electronic Supplementary Information

### Fluorescence amplification detection via terminal protection of small molecule-protein interactions

Sen Li,<sup>a</sup> Yu Li,<sup>a</sup> Hongwei Yu,<sup>a</sup> Zhan Wu,<sup>b</sup> Jianhui Jiang,<sup>b</sup> Ruqin Yu<sup>b</sup>  
and Yuansheng Wang <sup>\*a</sup>

<sup>a</sup>College of Science, The Naval University of Engineering, Wuhan, 430000, P. R.  
China. Tel./Fax: 0086-027-68771774;

<sup>b</sup>State Key Laboratory for Chemo/Biosensing and Chemometrics, College of  
Chemistry and Chemical Engineering, Hunan University, Changsha, 410082, P. R.  
China. Tel.: 86-731-8822577; fax: 86-731-8822782.

\*Corresponding author  
Tel. /Fax: 0086-027-68771774

E-mail address: qianxun8965@163.com.

**Table S1.** Comparison of analytical performance of some assays for IAA detection.

| Analytical method                                        | Detection limit | Reference |
|----------------------------------------------------------|-----------------|-----------|
| Microgravimetric sensor                                  | 200ng/mL        | 1         |
| Chemiluminescence sensor                                 | 0.01ng/mL       | 2         |
| Colorimetric luminescence sensor                         | 1mM             | 3         |
| Fluorescence sensor based on QDs                         | 0.1ng/mL        | 4         |
| Electrochemical sensor                                   | 3 pg/ $\mu$ L   | 5         |
| Fluorescence amplification assay via terminal protection | 0.4nM           | This work |

**Table S2.** Sequences of DNA oligonucleotides

---

| Name    | Sequences (5'-3')                            |
|---------|----------------------------------------------|
| probe 1 | ATATATTTTTTTTTTCTGGGTAAAGGTT-NH <sub>2</sub> |
| probe 2 | (FAM)-ACCTT(BHQ-1)AACCCAG                    |

---

## Notes and references

1. Y.-H. Fei, D. Liu, Z.-S. Wu, G.-L. Shen and R.-Q. Yu, *Bioconjugate chemistry*, 2011, **22**, 2369-2376.
2. X. Hun, Z. Mei, Z. Wang and Y. He, *Spectrochimica Acta Part A: Molecular and Biomolecular Spectroscopy*, 2012, **95**, 114-119.
3. Y. Liu, H. Dong, W. Zhang, Z. Ye, G. Wang and J. Yuan, *Biosensors and Bioelectronics*, 2010, **25**, 2375-2378.
4. Z. Lu, P. Zou, J. Lu and R. Wang, *Crop Res*, 2011, **25**, 531-534.
5. H. Gao, T. Jiang, W. R. Heineman, H. B. Halsall and J. L. Caruso, *Fresenius' journal of analytical chemistry*, 1999, **364**, 170-174.
